# Supplementary material for: Transforming growth factor-β is involved in maintaining oocyte meiotic arrest by promoting natriuretic peptide type C expression in mouse granulosa cells
Source: PubMed Central journal article supplement (PMC6646305; doi:10.1038/s41419-019-1797-5), 2019-07-22

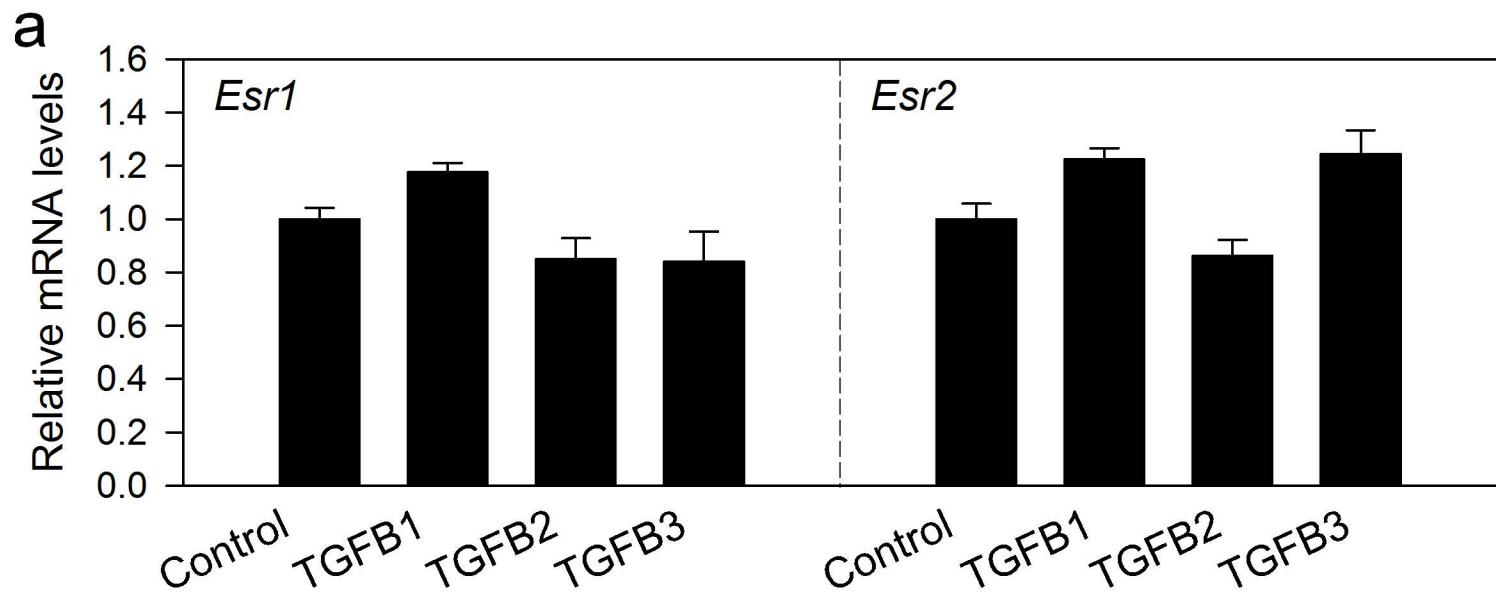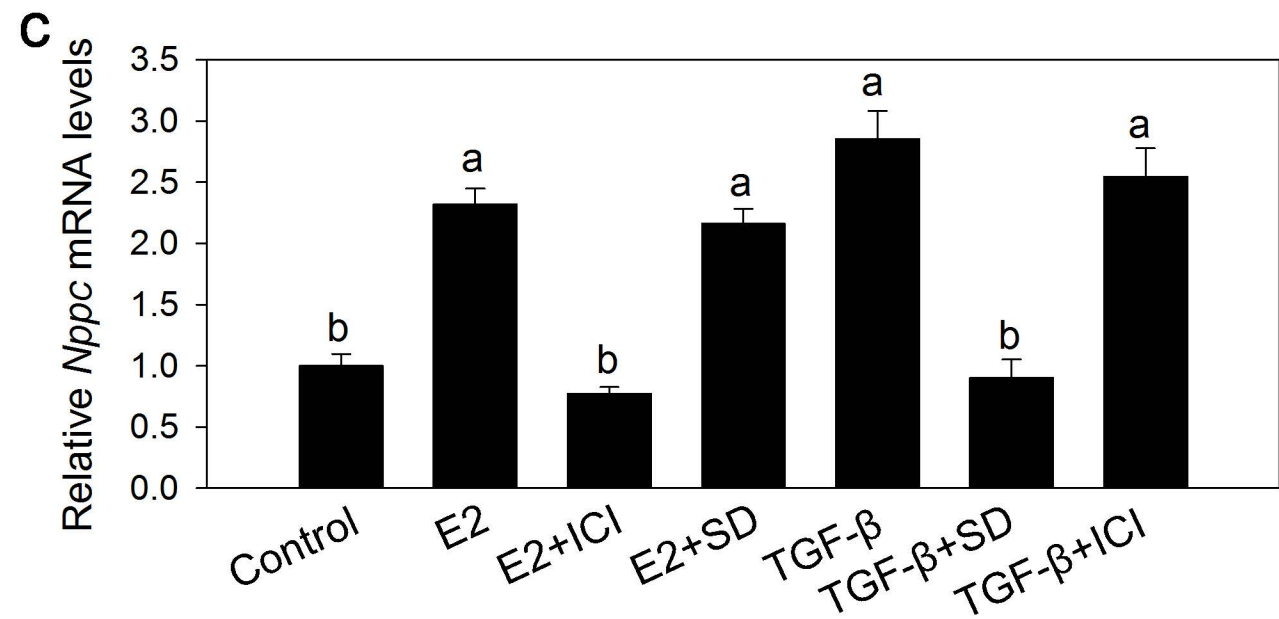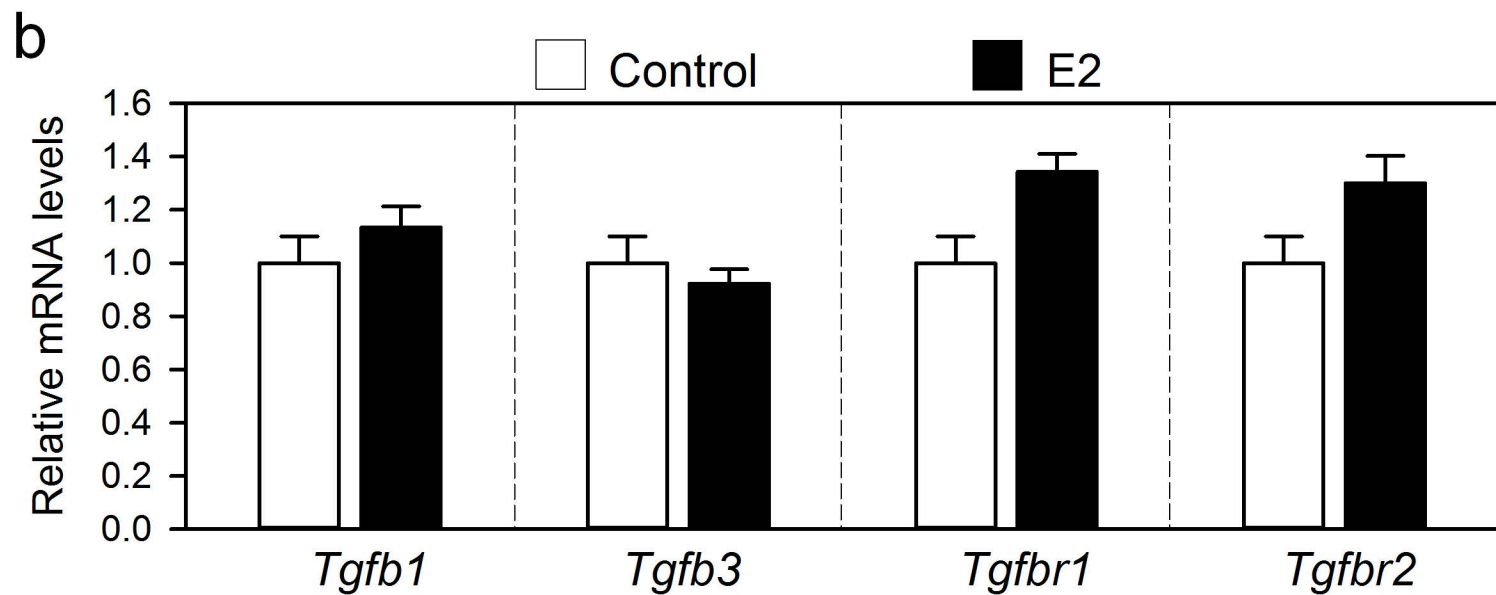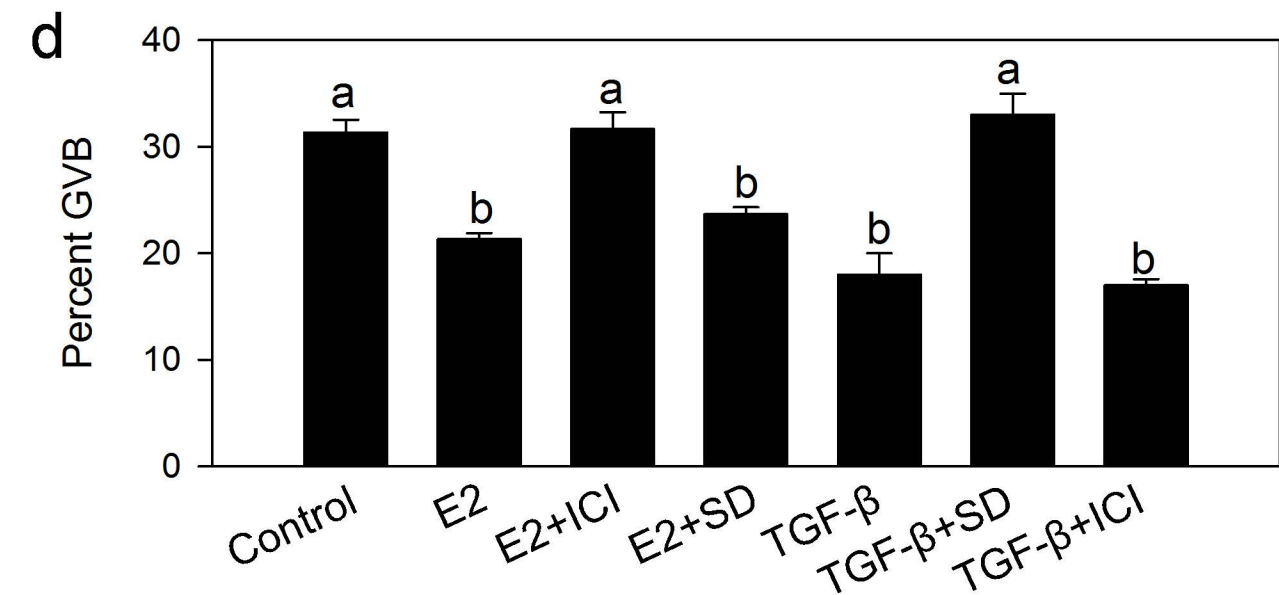

Supplement: 41419_2019_1797_MOESM4_ESM.pdf [file 41419_2019_1797_MOESM4_ESM.pdf]
