# Supplementary material for: Transforming growth factor-β is involved in maintaining oocyte meiotic arrest by promoting natriuretic peptide type C expression in mouse granulosa cells
Source: PubMed Central journal article supplement (PMC6646305; doi:10.1038/s41419-019-1797-5), 2019-07-22
Supplement: 41419_2019_1797_MOESM5_ESM.pdf [file 41419_2019_1797_MOESM5_ESM.pdf]

Relative luminescence intensity

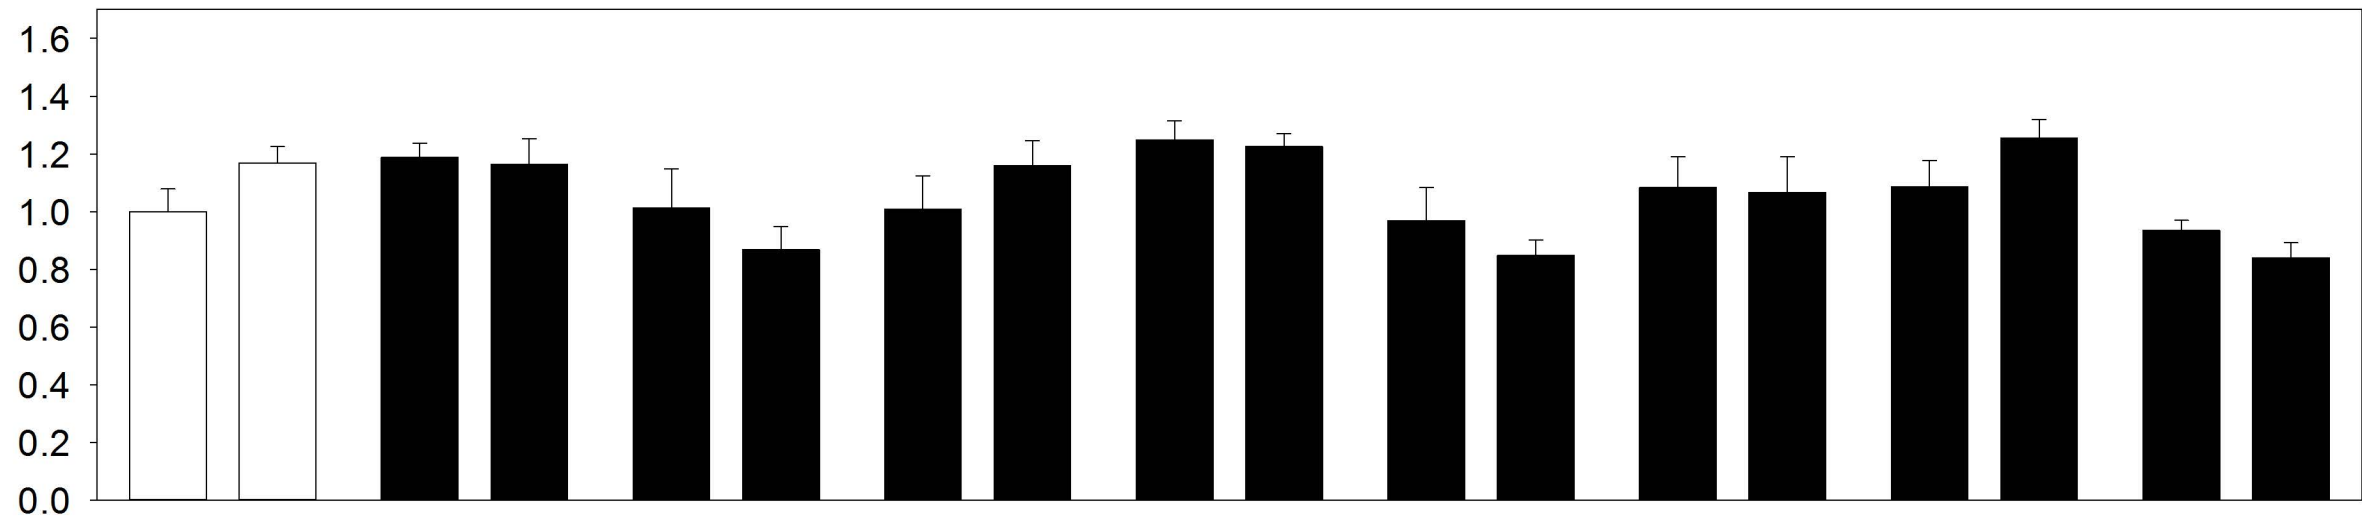

|                |   |   |    |   |    |   |    |   |    |   |    |   |    |   |    |   |     |   |
|----------------|---|---|----|---|----|---|----|---|----|---|----|---|----|---|----|---|-----|---|
| pGL3.0         | + | + | -  | - | -  | - | -  | - | -  | - | -  | - | -  | - | -  | - | -   | - |
| p <i>Smad3</i> | - | + | -  | + | -  | + | -  | + | -  | + | -  | + | -  | + | -  | + | -   | + |
| p <i>Nppc</i>  | - | - | +  | + | +  | + | +  | + | +  | + | +  | + | +  | + | +  | + | +   | + |
|                |   |   | R1 |   | R3 |   | R4 |   | R5 |   | R6 |   | R7 |   | R9 |   | R10 |   |
